# Supplementary material for: Identification of microenvironment related potential biomarkers of biochemical recurrence at 3 years after prostatectomy in prostate adenocarcinoma
Source: publisher site journal article supplement (doi:10.18632/aging.203121), 2021-06-16
Supplement: Supplementary file [file aging-v13i12-203121-supplementary-material-SD1.pdf]

# SUPPLEMENTARY FIGURES

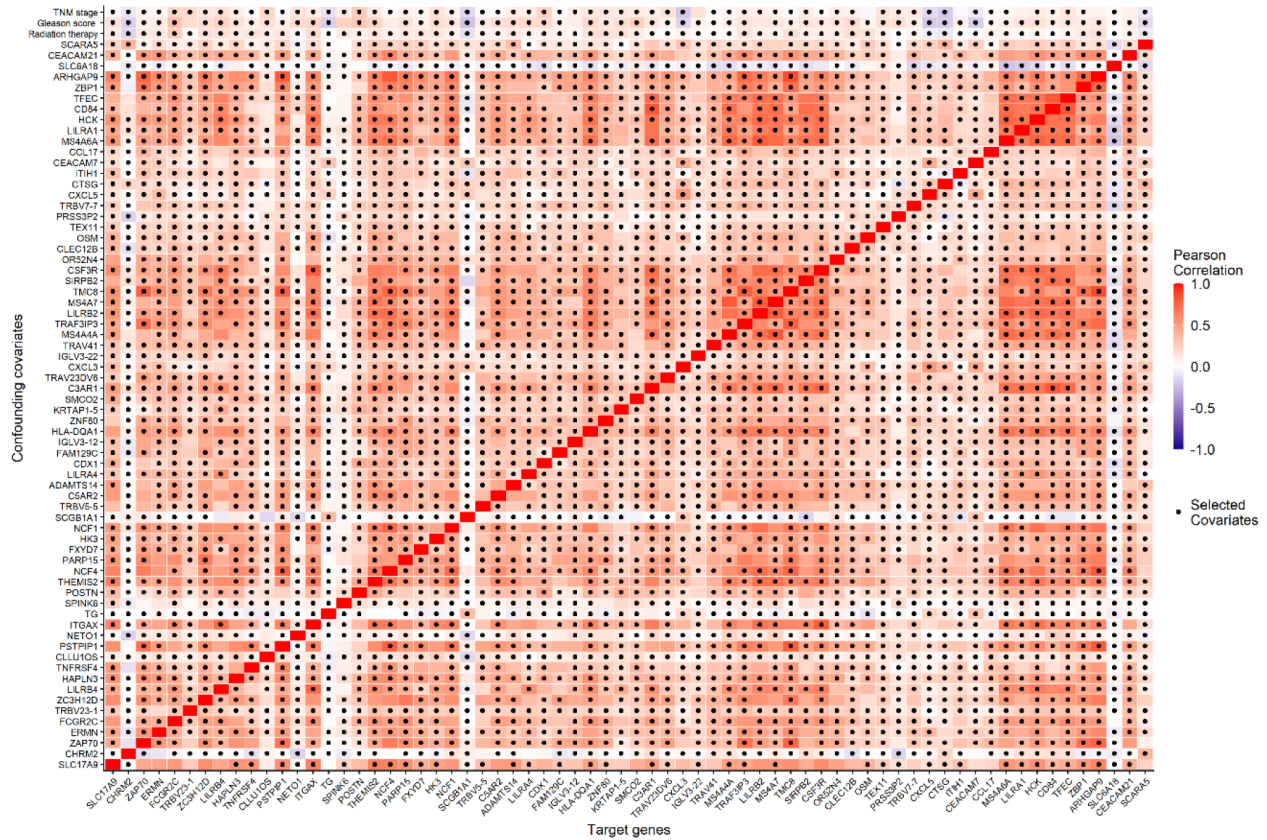

Supplementary Figure 1. The Pearson correlation coefficients (the corresponding color) of the 68 candidate genes (horizontal axis) and the 70 candidate confounding covariates (vertical axis), as well as the covariate set  $W_G$  that the candidate confounding covariates after removing variables  $W_G$  would be conditionally independent of outcome  $Y$  given  $W_G$  (the dark dot of each column).

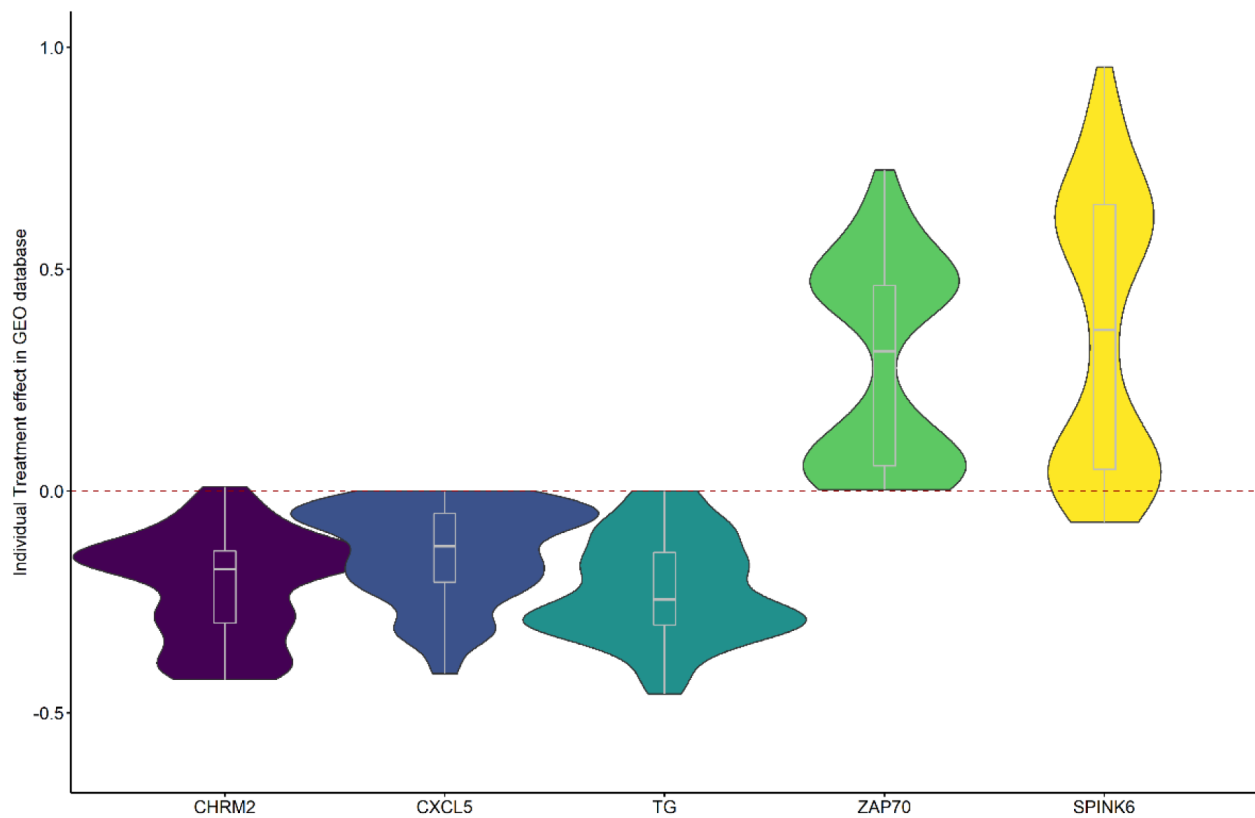

**Supplementary Figure 2. The individual causal effects of the validated genes in the GEO dataset.**
